# Supplementary material for: In-vitro activity of sodium-hypochlorite gel on bacteria associated with periodontitis
Source: Springer Nature journal article supplement (doi:10.1007/s00784-016-1711-9), 2016-01-12
Supplement: MOESM1 [file 8681974]

Suppl. Table 1

MIC and MBC values of NaOCl gel and chlorhexidine digluconate against studied bacterial strains and the 6-species mixtures (values are given in % of the available formulation (NaOCl gel and 0.1% chlorhexidine digluconate)

|  | **MIC of NaOCl gel and its components** | | | **MIC of chlorhexidine digluconate** | **MBC of NaOCl gel and its components** | | | **MBC of chlorhexidine digluconate** |
| --- | --- | --- | --- | --- | --- | --- | --- | --- |
| **NaOCl gel** | **NaOCl** | **Vehicle** | **NaOCl gel** | **NaOCl** | **Activating vehicle** |
| *Porphyromonas gingivalis* ATCC 33277 | 0.625 | 2.500 | 0.156 | 0.156 | 0.625 | 2.500 | 0.625 | 0.313 |
| *P. gingivalis* J430 | 0.039 | 0.039 | 0.078 | 0.078 | 0.078 | 0.078 | 0.156 | 0.078 |
| *P. gingivalis* ORA | 0.039 | 0.313 | 0.312 | 0.078 | 0.156 | 0.625 | 2.500 | 0.156 |
| *P. gingivalis* M5-1-2 | 0.039 | 0.625 | 0.156 | 0.078 | 0.078 | 1.250 | 0.313 | 0.156 |
| *Tannerella forsythia* ATCC 43037 | 0.020 | 0.156 | 0.312 | 0.078 | 0.039 | 0.156 | 0.312 | 0.156 |
| *T. forsythia* B13216 | 0.020 | 0.078 | 0.039 | 0.078 | 0.078 | 0.156 | 0.156 | 0.078 |
| *T. forsythia* RA12 | 0.039 | 0.039 | 0.156 | 0.039 | 0.078 | 0.078 | 0.156 | 0.039 |
| *T. forsythia* O20 | 0.078 | 0.313 | 0.313 | 0.078 | 0.156 | 0.625 | 0.313 | 0.078 |
| *Fusobacterium nucleatum* ATCC 25586 | 1.250 | 5.000 | >10.000 | 0.156 | 5.000 | 5.000 | >10.000 | 0.156 |
| *Streptococcus gordonii* ATCC 10558 | 10.000 | 5.000 | >10.000 | 0.078 | 10.000 | 2.500 | >10.000 | 0.156 |
| *Actinomyces naeslundii* ATCC 12104 | 10.000 | 1.250 | >10.000 | 0.156 | 10.000 | 2.500 | >10.000 | 0.156 |
| *Parvimonas micra* ATCC 33270 | >10.000 | 2.500 | >10.000 | 0.313 | >10.000 | 2.500 | >10.000 | 0.625 |
| *Prevotella intermedia* ATCC 25611 | 0.313 | 5.000 | 5.000 | 0.156 | 0.313 | 5.000 | 10.000 | 0.313 |
| *Aggregatibacter actinomycetemcomitans* ATCC 33384 | 10.000 | 5.000 | >10.000 | 0.313 | 10.000 | 10.000 | >10.000 | 0.625 |
| *Campylobacter rectus* ATCC 33238 | 0.625 | 2.500 | >10.000 | 0.078 | 5.000 | 1.250 | >10.000 | 0.078 |
| *Eikenella corrodens* ATCC 23834 | 2.500 | 5.000 | >10.000 | 2.500 | 5.000 | 5.000 | >10.000 | 5.000 |
| *Filifactor alocis* ATCC 33099 | 1.250 | 2.500 | >10.000 | 0.156 | 5.000 | 5.000 | >10.000 | 0.156 |
| *Capnocytophaga gingivalis* ATCC 33624 | 5.000 | 2.500 | 5.000 | 0.313 | 5.000 | 5.000 | >10.000 | 0.625 |
| *Eubacterium nodatum* ATCC 33270 | 5.000 | 5.000 | 5.000 | 0.020 | >10.000 | 5.000 | >10.000 | 0.156 |
| 6-species mixture | 1.250 | 5.000 | >10.000 | 0.313 | 10.000 | 5.000 | >10.000 | 1.250 |
